# Supplementary material
Source: Springer Nature journal article supplement (https://www.springermedizin.de/resource/supplementary/12963_2011_151_MOESM14_ESM.pdf/9572764)

# Adult

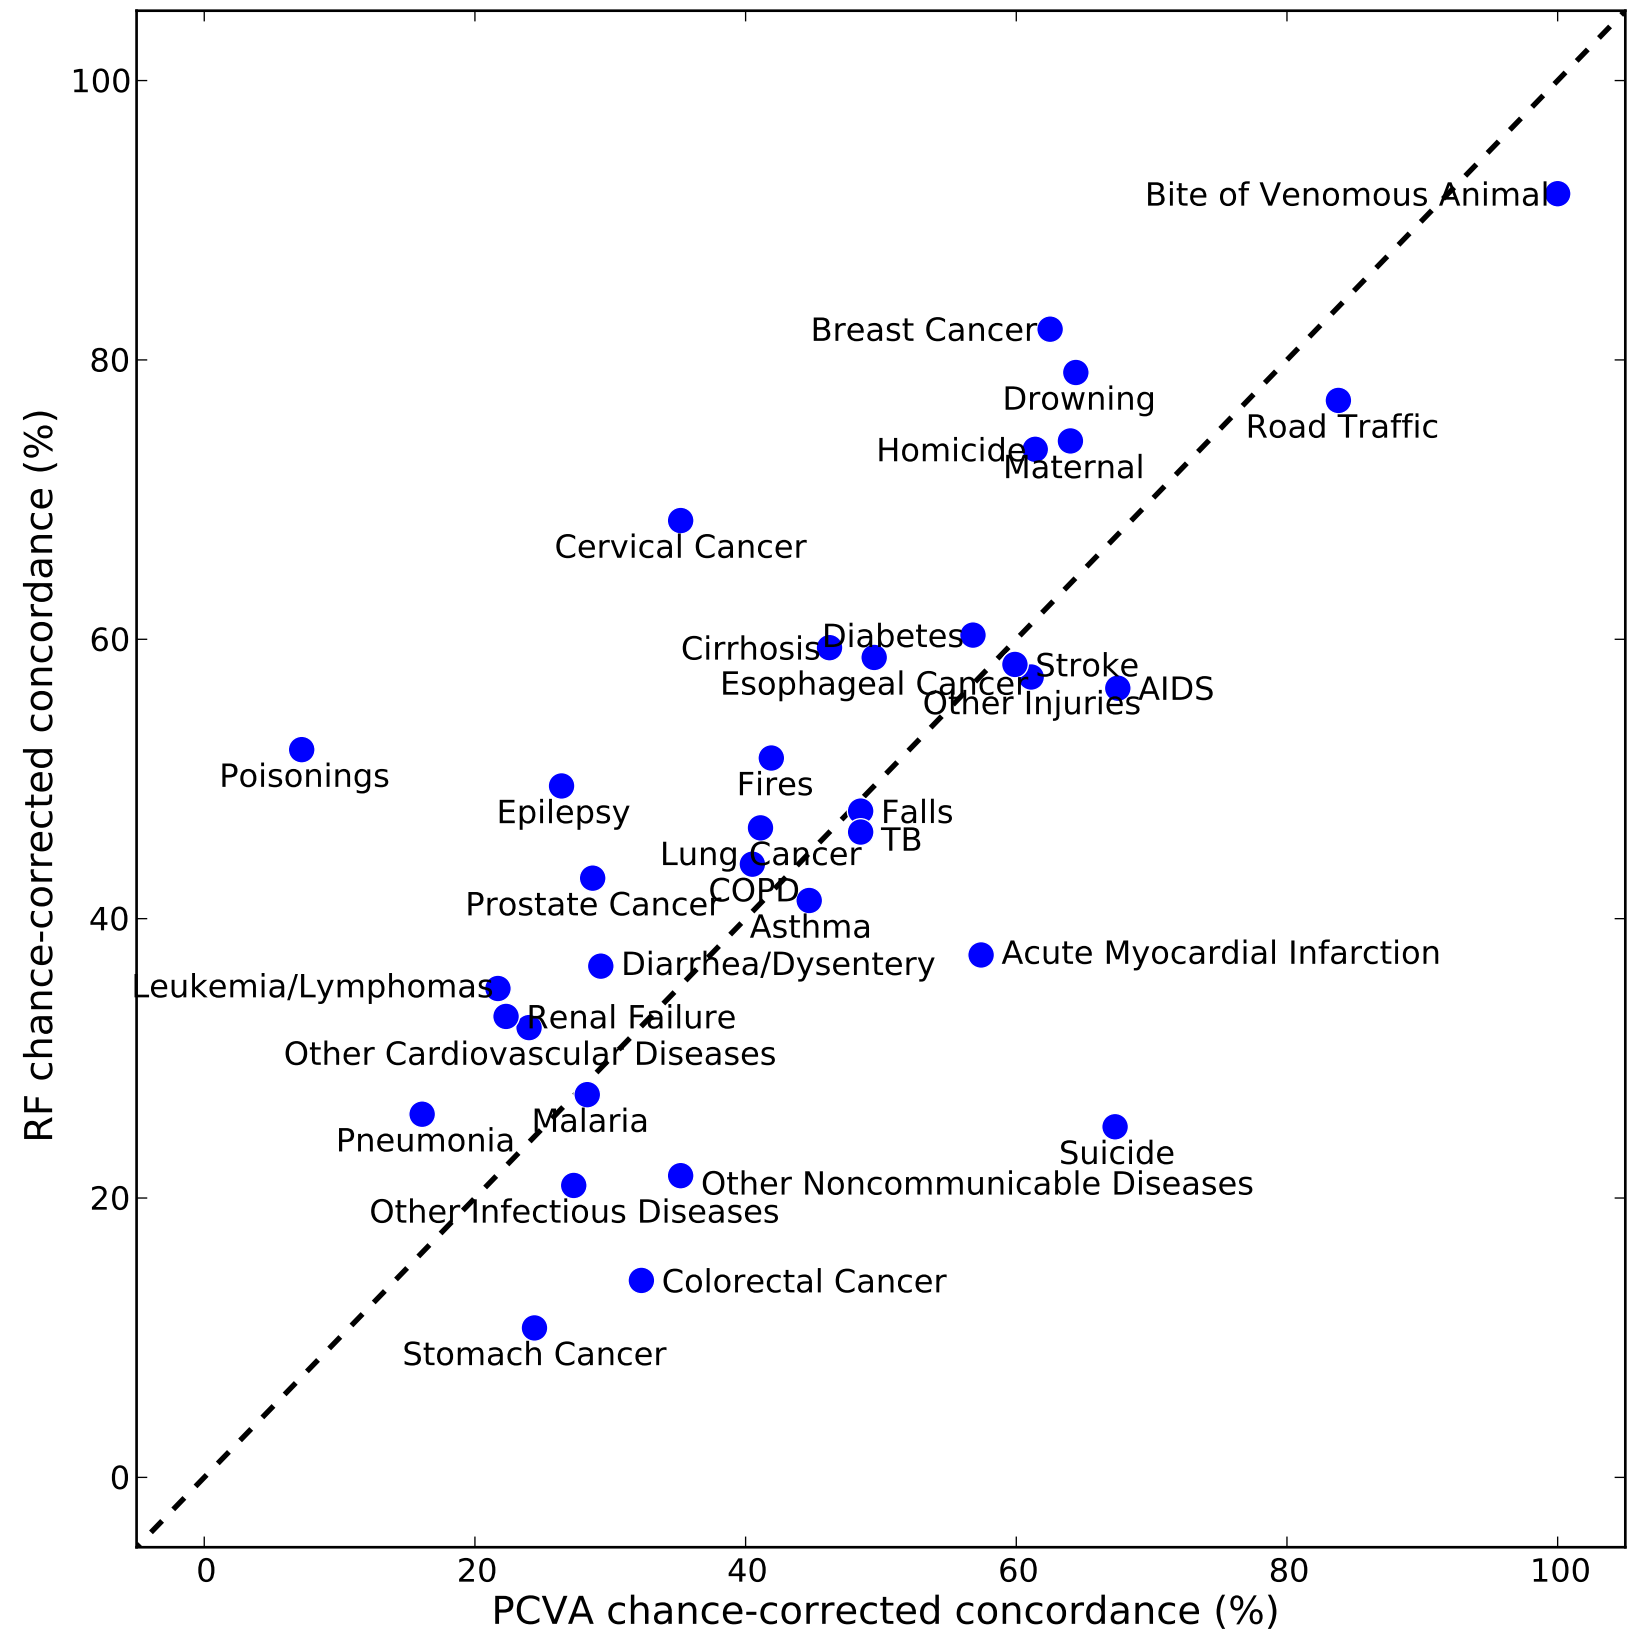

Supplement: MOESM14 [file 9572764]
